# Supplementary material
Source: PubMed Central journal article supplement (PMC6311703)
Supplement: NIHMS1000437-supplement-1.pdf [file NIHMS1000437-supplement-1.pdf]

Supplemental eTable 1. Percentage of missing data among participants with a 10-year predicted atherosclerotic cardiovascular disease risk  $\geq 7.5\%$  (n=5,709).

| Participant characteristics        | Missing<br>n (%) |
|------------------------------------|------------------|
| Age                                | 0 (0.0)          |
| Men                                | 0 (0.0)          |
| Black                              | 0 (0.0)          |
| Education < high school            | 1 (0.0)          |
| Annual household income < \$20,000 | 663 (11.6)       |
| Region of residence                |                  |
| Stroke belt                        | 0 (0.0)          |
| Stroke buckle                      | 0 (0.0)          |
| Non-belt                           | 0 (0.0)          |
| HDL cholesterol                    | 0 (0.0)          |

---

| Participant characteristics         | Missing<br>n (%) |
|-------------------------------------|------------------|
| Total cholesterol                   | 0 (0.0)          |
| High-sensitivity c-reactive protein | 112 (2.0)        |
| Systolic blood pressure             | 0 (0.0)          |
| Diastolic blood pressure            | 0 (0.0)          |
| Antihypertensive medication use     | 0 (0.0)          |

---

| Participant characteristics         | Missing<br>n (%) |
|-------------------------------------|------------------|
| Albumin-to-creatinine ratio         | 188 (3.3)        |
| Estimate glomerular filtration rate | 0 (0.0)          |
| Lifestyle factors                   |                  |
| Waist circumference                 | 13 (0.2)         |
| Physical activity                   | 73 (1.3)         |
| Smoking status                      | 0 (0.0)          |
| Saturated fat intake                | 1,500 (26.3)     |
| Mediterranean diet score            | 1,562 (27.4)     |

Supplemental eTable 2. Coronary Heart Disease and Stroke Events for Each and the Number of Healthy Lifestyle Factors Among Participants With a 10-year Predicted Atherosclerotic Cardiovascular Disease Risk  $\geq 7.5\%$  (n=5,709).

|                                      | CHD / stroke Events | Total incident<br>ASCVD <sup>a</sup> events | N at risk |
|--------------------------------------|---------------------|---------------------------------------------|-----------|
| Individual healthy lifestyle factors |                     |                                             |           |
| Waist circumference                  |                     |                                             |           |
| Obese                                | 85 / 69             | 154                                         | 2,459     |
| Non-obese                            | 118 / 105           | 223                                         | 3,250     |
| Physical activity                    |                     |                                             |           |
| None                                 | 49 / 65             | 114                                         | 1,720     |
| 1 – 4 times per week                 | 83 / 73             | 156                                         | 2,502     |
| $\geq 5$ times per week              | 58 / 49             | 107                                         | 1,488     |
| Smoking status                       |                     |                                             |           |
| Current                              | 51 / 40             | 91                                          | 1,100     |
| Nonsmoker                            | 152 / 134           | 286                                         | 4,609     |

| Saturated fat intake                             |           |     |       |
|--------------------------------------------------|-----------|-----|-------|
| ≥ 7.0% of daily calories                         | 195 / 160 | 355 | 5,292 |
| < 7.0% of daily calories                         | 8 / 14    | 22  | 417   |
| Mediterranean diet score <sup>b</sup>            |           |     |       |
| Quartile 1 (worse)                               | 58 / 71   | 129 | 1,792 |
| Quartile 2                                       | 42 / 36   | 78  | 1,143 |
| Quartile 3                                       | 50 / 32   | 82  | 1,190 |
| Quartile 4 (better)                              | 42 / 45   | 88  | 1,584 |
| Number of healthy lifestyle factors <sup>c</sup> |           |     |       |
| 0                                                | 6 / 15    | 21  | 289   |
| 1                                                | 65 / 53   | 118 | 1,649 |
| 2                                                | 65 / 69   | 134 | 2,104 |
| 3                                                | 30 / 51   | 81  | 1,238 |
| ≥ 4                                              | 14 / 9    | 23  | 429   |

ASCVD: atherosclerotic cardiovascular disease.

CHD: coronary heart disease.

REGARDS: REasons for Geographic and Racial Differences in Stroke.

<sup>a</sup>Incident atherosclerotic cardiovascular disease: a stroke (nonfatal or fatal and ischemic or hemorrhagic) or CHD (nonfatal myocardial infarction or CHD death) event.

<sup>b</sup>Quartiles determined using all REGARDS study participants.

Mediterranean diet score cut-points: [quartile 1 (low) to quartile 4 (high)] <3, 3 to <4, 4 to <6, and  $\geq 6$ .

<sup>c</sup>Number of healthy lifestyle factors: the sum of a non-obese waist circumference (<102 cm for men and <88 cm for women), physical activity  $\geq 5$  times per week, nonsmoking, saturated fat intake < 7.0% of average daily calories and Mediterranean diet score in quartile.

Supplemental eTable 3. Incidence Rates and Hazard Ratios of Incident Atherosclerotic Cardiovascular Disease<sup>a</sup> Associated With Healthy Lifestyle Factors Among Participants With a 10-year Predicted Atherosclerotic Cardiovascular Disease Risk  $\geq 7.5\%$  Using the Un-Imputed Data Set (complete case analysis).

|                                      | Events /<br>n at risk | Crude incidence rate<br>per 1,000 person<br>years<br>(95% confidence<br>interval) |                | Hazard Ratio (95% confidence interval) |              |                      |              |
|--------------------------------------|-----------------------|-----------------------------------------------------------------------------------|----------------|----------------------------------------|--------------|----------------------|--------------|
|                                      |                       |                                                                                   |                | Model 1 <sup>b</sup>                   |              | Model 2 <sup>c</sup> |              |
| Individual healthy lifestyle factors |                       |                                                                                   |                |                                        |              |                      |              |
| Waist circumference                  |                       |                                                                                   |                |                                        |              |                      |              |
| Obese                                | 154 / 2,452           | 10.97                                                                             | (9.24, 12.70)  | 1 (ref)                                |              | 1 (ref)              |              |
| Non-obese                            | 222 / 3,244           | 11.70                                                                             | (10.16, 13.23) | 0.95                                   | (0.76, 1.19) | 1.16                 | (0.91, 1.48) |
| Physical activity                    |                       |                                                                                   |                |                                        |              |                      |              |
| None                                 | 111 / 1,699           | 11.54                                                                             | (9.39, 13.69)  | 1 (ref)                                |              | 1 (ref)              |              |
| 1 – 4 times per week                 | 152 / 2,467           | 10.49                                                                             | (8.82, 12.16)  | 0.87                                   | (0.67, 1.13) | 0.93                 | (0.71, 1.21) |

|                                       |             |       |                |      |              |      |              |
|---------------------------------------|-------------|-------|----------------|------|--------------|------|--------------|
| ≥ 5 times per week                    | 106 / 1,469 | 12.33 | (9.98, 14.68)  | 0.94 | (0.71, 1.25) | 1.04 | (0.77, 1.39) |
| p-trend                               |             |       |                |      | 0.600        |      | 0.662        |
| Smoking status                        |             |       |                |      |              |      |              |
| Current                               | 91 / 1,100  | 15.40 | (12.24, 18.57) |      | 1 (ref)      |      | 1 (ref)      |
| Nonsmoker                             | 286 / 4,609 | 10.52 | (9.30, 11.74)  | 0.51 | (0.39, 0.67) | 0.56 | (0.43, 0.74) |
| Saturated fat intake                  |             |       |                |      |              |      |              |
| ≥ 7.0% of daily calories              | 269 / 3,916 | 11.66 | (10.27, 13.05) |      | 1 (ref)      |      | 1 (ref)      |
| < 7.0% of daily calories              | 15 / 293    | 8.34  | (4.12, 12.57)  | 0.65 | (0.37, 1.14) | 0.74 | (0.42, 1.30) |
| Mediterranean diet score <sup>d</sup> |             |       |                |      |              |      |              |
| Quartile 1 (worse)                    | 93 / 1,302  | 12.42 | (9.90, 14.95)  |      | 1 (ref)      |      | 1 (ref)      |
| Quartile 2                            | 60 / 837    | 12.16 | (9.08, 15.24)  | 0.93 | (0.66, 1.30) | 0.96 | (0.68, 1.37) |
| Quartile 3                            | 62 / 867    | 12.00 | (9.02, 14.99)  | 0.88 | (0.63, 1.23) | 0.98 | (0.69, 1.39) |
| Quartile 4 (better)                   | 67 / 1,141  | 9.70  | (7.38, 12.03)  | 0.72 | (0.51, 1.00) | 0.81 | (0.58, 1.14) |
| p-trend                               |             |       |                |      | 0.054        |      | 0.102        |



| Number of healthy lifestyle factors <sup>e</sup> |             |       |                |         |              |         |              |
|--------------------------------------------------|-------------|-------|----------------|---------|--------------|---------|--------------|
| 0                                                | 11 / 199    | 9.98  | (4.08, 15.88)  | 1 (ref) |              | 1 (ref) |              |
| 1                                                | 87 / 1,153  | 13.12 | (10.36, 15.87) | 1.07    | (0.55, 2.07) | 1.13    | (0.58, 2.21) |
| 2                                                | 100 / 1,518 | 11.06 | (8.89, 13.23)  | 0.77    | (0.40, 1.51) | 0.89    | (0.45, 1.76) |
| 3                                                | 60 / 909    | 10.95 | (8.18, 13.72)  | 0.67    | (0.33, 1.35) | 0.79    | (0.39, 1.62) |
| ≥ 4                                              | 15 / 311    | 7.72  | (3.82, 11.63)  | 0.52    | (0.22, 1.19) | 0.66    | (0.28, 1.54) |
| p-trend                                          |             |       |                | <0.001  |              | <0.001  |              |

<sup>a</sup>Incident atherosclerotic cardiovascular disease: a stroke (nonfatal or fatal and ischemic or hemorrhagic) or CHD (nonfatal myocardial infarction or CHD death) event.

<sup>b</sup>Model 1: adjustment for age, race, sex, education, income and geographic region of residence.

<sup>c</sup>Model 2: adjustment for Model 1 variables plus high-density lipoprotein and total cholesterol, c-reactive protein >3 mg/L, systolic and diastolic blood pressure, antihypertensive medication use, albumin-to-creatinine ratio ≥30 g/mg and estimated glomerular filtration rate <60 ml/min/1.73 m<sup>2</sup>.

<sup>d</sup>Quartiles determined using all participants.

Mediterranean diet score cut-points: [quartile 1 (low) to quartile 4 (high)] <3, 3 to <4, 4 to <6, and ≥6.

<sup>c</sup>Number of healthy lifestyle factors: the sum of a non-obese waist circumference (<102 cm for men and <88 cm for women), physical activity  $\geq 5$  times per week, nonsmoking, saturated fat intake < 7.0% of average daily calories and Mediterranean diet score in quartile 4.

Supplemental eTable 4. Incidence Rates and Hazard Ratios of All-Cause Mortality<sup>a</sup> Associated With Healthy Lifestyle Factors Among Participants With a 10-year Predicted Atherosclerotic Cardiovascular Disease Risk  $\geq 7.5\%$  Using the Un-Imputed Data Set (complete case analysis).

|                                      | Events /<br>n at risk | Crude incidence rate<br>per 1,000 person<br>years<br>(95% confidence<br>interval) | Hazard Ratio (95% confidence interval) |              |                      |              |
|--------------------------------------|-----------------------|-----------------------------------------------------------------------------------|----------------------------------------|--------------|----------------------|--------------|
|                                      |                       |                                                                                   | Model 1 <sup>d</sup>                   |              | Model 2 <sup>e</sup> |              |
| Individual healthy lifestyle factors |                       |                                                                                   |                                        |              |                      |              |
| Waist circumference                  |                       |                                                                                   |                                        |              |                      |              |
| Obese                                | 193 / 2,452           | 13.33 (11.45, 15.21)                                                              | 1 (ref)                                |              | 1 (ref)              |              |
| Non-obese                            | 278 / 3,244           | 14.18 (12.51, 15.85)                                                              | 0.93                                   | (0.76, 1.14) | 1.05                 | (0.85, 1.31) |
| Physical activity                    |                       |                                                                                   |                                        |              |                      |              |
| None                                 | 163 / 1,699           | 16.47 (13.94, 19.00)                                                              | 1 (ref)                                |              | 1 (ref)              |              |
| 1 – 4 times per week                 | 172 / 2,467           | 11.50 (9.78, 13.22)                                                               | 0.64                                   | (0.51, 0.80) | 0.71                 | (0.56, 0.90) |

|                                             |             |                      |      |              |      |              |
|---------------------------------------------|-------------|----------------------|------|--------------|------|--------------|
| ≥ 5 times per week                          | 124 / 1,469 | 13.92 (11.47, 16.37) | 0.75 | (0.58, 0.96) | 0.85 | (0.65, 1.10) |
| p-trend                                     |             |                      |      | 0.009        |      | 0.028        |
| <b>Smoking status</b>                       |             |                      |      |              |      |              |
| Current                                     | 136 / 1,100 | 22.18 (18.45, 25.91) |      | 1 (ref)      |      | 1 (ref)      |
| Nonsmoker                                   | 335 / 4,609 | 11.95 (10.67, 13.23) | 0.35 | (0.28, 0.44) | 0.39 | (0.31, 0.49) |
| <b>Saturated fat intake</b>                 |             |                      |      |              |      |              |
| ≥ 7.0% of daily calories                    | 301 / 3,916 | 12.62 (11.20, 14.05) |      | 1 (ref)      |      | 1 (ref)      |
| < 7.0% of daily calories                    | 24 / 293    | 12.91 (7.74, 18.07)  | 0.90 | (0.58, 1.39) | 0.89 | (0.56, 1.40) |
| <b>Mediterranean diet score<sup>c</sup></b> |             |                      |      |              |      |              |
| Quartile 1 (worse)                          | 122 / 1,302 | 15.73 (12.94, 18.52) |      | 1 (ref)      |      | 1 (ref)      |
| Quartile 2                                  | 80 / 837    | 15.71 (12.27, 19.16) | 0.91 | (0.67, 1.22) | 0.85 | (0.62, 1.16) |
| Quartile 3                                  | 56 / 867    | 10.46 (7.72, 13.21)  | 0.60 | (0.43, 0.83) | 0.60 | (0.43, 0.85) |
| Quartile 4 (better)                         | 63 / 1,141  | 8.85 (6.66, 11.03)   | 0.52 | (0.38, 0.72) | 0.53 | (0.38, 0.74) |
| p-trend                                     |             |                      |      | <0.001       |      | <0.001       |

| Number of healthy lifestyle factors <sup>b</sup> |             |       |                |         |              |         |              |
|--------------------------------------------------|-------------|-------|----------------|---------|--------------|---------|--------------|
| 0                                                | 19 / 199    | 16.92 | (9.31, 24.53)  | 1 (ref) |              | 1 (ref) |              |
| 1                                                | 105 / 1,153 | 15.24 | (12.33, 18.16) | 0.60    | (0.37, 0.99) | 0.69    | (0.40, 1.16) |
| 2                                                | 110 / 1,518 | 11.78 | (9.58, 13.98)  | 0.40    | (0.24, 0.67) | 0.46    | (0.27, 0.80) |
| 3                                                | 65 / 909    | 11.47 | (8.68, 14.26)  | 0.37    | (0.21, 0.63) | 0.44    | (0.25, 0.79) |
| ≥ 4                                              | 14 / 311    | 7.04  | (3.35, 10.72)  | 0.24    | (0.12, 0.50) | 0.30    | (0.14, 0.64) |
| p-trend                                          |             |       |                | <0.001  |              | <0.001  |              |

<sup>a</sup>All-cause mortality: death due to any cause.

<sup>b</sup>Number of healthy lifestyle factors: the sum of a non-obese waist circumference (<102 cm for men and <88 cm for women), physical activity ≥ 5 times per week, nonsmoking, saturated fat intake < 7.0% of average daily calories and Mediterranean diet score in quartile 4.

<sup>c</sup>Quartiles determined using all participants.

Mediterranean diet score cut-points: [quartile 1 (low) to quartile 4 (high)] < 3, 3 to < 4, 4 to < 6, and ≥ 6.

<sup>d</sup>Model 1: adjustment for age, race, sex, education, income and geographic region of residence.

<sup>c</sup>Model 2: adjustment for Model 1 variables plus high-density lipoprotein and total cholesterol, c-reactive protein >3 mg/L, systolic and diastolic blood pressure, antihypertensive medication use, albumin-to-creatinine ratio  $\geq 30$  g/mg and estimated glomerular filtration rate <60 ml/min/1.73 m<sup>2</sup>.
